# Supplementary material for: What is known about adolescent dysmenorrhoea in (and for) community health settings?
Source: Front Reprod Health. 2024 Jul 23;6:1394978. doi: 10.3389/frph.2024.1394978 (PMC11300274; doi:10.3389/frph.2024.1394978)
Supplement: Supplementary file 2 [file Table2.xlsx]

## Sheet: Sheet1
Appendix B: references included in Figure 2: map of prevalence.
title	authors	year	country	population	method	study prevalence	country level prevalence
Primary Dysmenorrhea in Young Western Australian Women: Prevalence, Impact, and Knowledge of Treatment	Hillen TI, Grbavac SL, Johnston PJ, Straton JA, Keogh JM.	1999	Australia	388 school students from 3 schools questionnaire in school time, age 15-17	cross-sectional questionnaire study, completed in school, response rate 388/389 (384 post-menarchal)	prevalence of dysmenorrhoea was 80%	Australia: Studies=3, N=5,607, prevalence range 80-93%, references 1-3
The menstrual disorder of teenagers (MDOT) study: determining typical menstrual patterns and menstrual disturbance in a large populationbased study of Australian teenagers	MA Parker, AE Sneddon, P Arbon	2009	Australia	1051 school students across 4 schools, mean age 16 years, 10 months	cross-sectional questionnaire study conducted in school, response rate 98%	prevalence dysmenorrhoea 93%
The Prevalence and Educational Impact of Pelvic and Menstrual Pain in Australia: A National Online Survey of 4202 Young Women Aged 13-25 Years	Mike Armour, Tania Ferfolja, Christina Curry, Mikayla S. Hyman, K. Jane Chalmers, Caroline A. Smith, Freya MacMillan, Kathryn Holmes	2020	Australia	4202 school (2421) and university (1781) students, median age 17	cross-sectional study, online questionnaire	prevalence dysmenorrhoea 92%, prevalence in school students 91.7%
Characteristics of the menstrual cycle in 13-year-old Flemish girls and the impact of menstrual symptoms on social life	Karel Hoppenbrouwers, Karla Van Leeuwen, Anna Rijkers, Mathieu Roelants, Annemie Desoete, Christel Meuleman, Thomas D’Hooghe	2016	Belgium	769 13 year old girls resident in eight regions in Flanders Belgium	Cross-sectional questionnaire study nested in a cohort (JOnG!) in 8 regions in Flanders. Parents of all 5056 girls born in 1996 were contacted with information about the study in 2009.	prevalence of dysmenorrhoea was 41.65 (and in 62.9% of these, pain started with the first menstruation).	Belgium: Studies =1, N=769, prevalence amongst 13 year olds 42%, reference 4
Menstruation Disturbances: Prevalence, Characteristics, and Effects on the Activities of Daily Living among Adolescent Girls from Brazil	Ana Carolina R. Pitangui, Mayra Ruana de A. Gomes, Alaine Souza Lima, Paulo Adriano Schwingel, Ana Paula dos S. Albuquerque, Rodrigo Cappato de Araujo	2013	Brazil	105 school students, mean age 13.7	cross-sectional questionnaire study, total available sampling frame 584	prevalence dysmenorrhoea 73%	Brazil: Studies=1, N=105, prevalence dysmenorrhoea =73%, reference 5
Use of Medication by Adolescents for the Management of Menstrual Discomfort	Campbell, McGrath	1997	Canada	289 adolescents recruited from one school, mean age 16.3	cross-sectional questionnaire study, response rate 80%, 18 responses not included (10 no parental consent, 7 patients with secondary dysmenorrhoea, 1 participant with Crohn's disease, 2 pre-menarcheal)	prevalence dysmenorrhoea 93%	Canada: Studies=1, N=289, prevalence=93%, reference 6
Early Menarche and Menstrual Problems Are Associated with Sleep Disturbance in a Large Sample of Chinese Adolescent Girls	Liu, X., Chen, H., Liu, Z.Z., Fan, F. and Jia, C.X.	2017	China	5800 girls participating in a longitudinal cohort study (Shandong Adolescent Beahaviour and Health Cohort), mean age 15	cross-sectional study: baseline survey data from a cohort study	prevalence dysmenorrhoea=72.1%	China: Studies=3, N=11,083, prevalence 42-94%, references 7-9
Mediating effect of interpersonal relations on negative emotions and dysmenorrhea in female adolescents	Lingli Mou, Wei Lei, Jing Chen, Rong Zhang, Kezhi Liu, Xuemei Liang	2019	China	855 college students from nursing college, 807 with dysmenorrhoea (mean age 16.9) and 48 without dysmenorrhoea (mean age 17)	cross-sectional questionnaire study, response rate 97%	prevalence dyamenorrhoea=94.4%
Prevalence and Risk Factors Associated with Primary Dysmenorrhea among Chinese Female University Students: A Cross-sectional Study	Zhao Hu, Lu Tang, Ling Chen, Atipatsa Chiwanda Kaminga, Huilan Xu	2020	China	4428 university students, mean age 19	cross-sectional questionnaire study, approached 4874 students, 135 not in school during investigation and 133 declined. 152 excluded as known gynaecological disease, and 26 for incomplete data.	Prevalence primary dysmenorrhoea = 41.7%
Anthropological and Clinical Characteristics in Adolescent Women with Dysmenorrhea	Tomislav Strinic, Damir Bukovic, Ljubomir Pavelic, Josip Fajdic, Ivan Herman, Ivica Stipic, Ivan Palada, Ivana Hirs	2003	Croatia	297 school students, mean age not reported	cross-sectional questionnaire study, response rate 92%	prevalence dysmenorrhoea = 55%	Croatia: Studies =1, N=297, prevalence 55%, reference 10
Epidemiology of dysmenorrhoea among adolescent students in Mansoura, Egypt	A-H. El-Gilany, K. Badawi, S. El-Fedawy	2005	Egypt	664 high school students from government schools, mean age 15	cross-sectional study, 95.7% response rate	prevalence dysmenorrhoea = 74.6%	Egypt: Studies =2, N=949, prevalence 66-75%, reference 11-12
Nature and Prevalence of Menstrual Disorders among Teenage Female Students at Zagazig University, Zagazig, Egypt	Ahmed M. Nooh, Atiea Abdul-Hady, Nadia El-Attar	2016	Egypt	285 First year university students recruited from pre-enrollment medical, mean age 17.7	cross-sectional questionnaire study, recruitment to a pre-determined sample size of 283.	prevalence dysmenorrhoea 66%
Prevalence of primary dysmenorrhea, its intensity, impact and associated factors among female students’ at Gondar town preparatory school, Northwest Ethiopia	Abere Woretaw Azagew, Destaye Guadie Kassie, Tarkie Abebe Walle	2020	Ethiopia	459 secondary school students most <18 from three preparatory (high schools)	cross-sectional study, response rate 96.29%	prevalence dysmenorrhoea 64.7%	Ethiopia: Studies=2, N=1,071, prevalence 65-72%, references 13,14
Age at menarche and the menstrual pattern of secondary school adolescents in northwest Ethiopia	Desalegn Tegabu Zegeye, Berihun Megabiaw, Abay Mulu	2009	Ethiopia	612 school students from 2 schools, mean age 16.4	cross-sectional questionnaire study, 612/622 pupils enrolled completed the questionnaire	prevalence dysmenorrhoea =72%
Prevalence of Pain Symptoms Suggestive of Endometriosis Among Finnish Adolescent Girls (TEENMAPS Study)	P.A. Suvitie, M.K. Hallamaa, J.M. Matomaki, J.I. Makinen, A.H. Perheentupa	2016	Finland	1103 school students in Finland, mean age 16.8	cross-sectional questionnaire study, response rate 43% (significant variation between schools and cities)	The prevalence of dysmenorrhea was 68% (738/1092)	Finland: Studies=2, N=4,473, prevalence 48% (12 year olds), 68-79% older adolescents, references 15,16
Menstrual pain, health and behaviour in girls	Teperi, Rimpela	1989	Finland	3370, 12-18 year olds born in Finland in July 1964,1966, 1968, 1970	cross-sectional questionnaire study, embedded in existing cohort, response rate 87%	prevalence dysmenorrhoea 48% in 12 year olds and 79% among 18 year olds.
Adolescent Dysmenorrhea	Charles Sultana, Claire Jeandela, Françoise Paris, Sihem Trimechea	2004	France	4203 adolescents aged 14-18	cohort/case series: data collected in middle and high schools in one city, with school physicians recording data as part of systematic medical examination.	prevalence of dysmenorrhoea 21%	France: Studies=1, N=4203, prevalence =21%, reference 17
Primary dysmenorrhea: prevalence in adolescent population of Tbilisi, Georgia and risk factors	Tinatin Gagua, Besarion Tkeshelashvili, David Gagua	2012	Georgia	Cross sectional study 2561 adolescents recruited in schools. Embedded case control study of 431 students (148 no dysmneonorrhoea mean age 15.55, 276 with dysmenorrhoea, mean age 16.03)	cross sectional study: 2561/2890 agreed to participate. Nested case-control study	prevalence in population survey 52.07%	Georgia: Studies=1, N=2561, prevalence = 52%, reference 18
MENSTRUAL CHARACTERISTICS IN SOME ADOLESCENT GIRLS IN ACCRA, GHANA	S. K. GUMANGA and R. A. KWAME-ARYEE	2012	Ghana	456 secondary school students from one school, mean age 16	cross-sectional questionnaire study. response rate 91.2%	prevalence of dysmenorrhoea was 74.4%	Ghana: Studies=1, N=456, prevalence =74%, reference=19
Health-related quality of life among Chinese adolescent girls with Dysmenorrhoea	Lee Wong	2018	Hong Kong	653 school students from three schools, mean age 15.7	cross-sectional questionnaire study, response rate: of 6 schools approached, 3 agreed to participate	prevalence dysmenorrhoea 65.5%	Hong Kong: studies=2, N=6,262, prevalence =66-69%, references 20,21
Menstrual problems and health-seeking behaviour in Hong Kong Chinese girls	Symphorosa SC Chan, KW Yiu, PM Yuen, DS Sahota, Tony KH Chung	2009	Hong Kong	Chinese students in Hong Kong, 10 secondary schools, N=5609, mean age 15.1	cross-sectional study, 10/20 schools approached agreed to participate, of the students approached, 96.5% response rate	prevalence dysmenorrhoea= 68.7%
How do school girls deal with dysmenorrhoea?	Chaudhari, Singh	2012	India	224 school students recruited from 2 schools, mean age of 128 students with dysmenorrhoea = 14.2	cross-sectional questionnaire study, no response rate reported	prevalence dysmenorrhoea =59.8%	India: Studies=8, N= 3,976, prevalence 56-79%, references 22-29
Practices and perceptions of adolescent girls regarding the impact of dysmenorrhea on their routine life: a comparative study in the urban, rural, and slum areas of Chandigarh	Alka Rani, Manoj Kumar Sharma, Amarjeet Singh	2015	India	300 adolescents from three areas (urbal, rural, slum) in one region, aged 11-18	cross-sectional study including questionnaires and interview.	prevalence dysmenorrhoea=63.1%
A Study of Dysmenorrhea During Menstruation in Adolescent Girls	Anil K Agarwal, Anju Agarwal	2010	India	970 secondary school students age 15-20 (from pre-university college school/course). From three schools.	cross-sectional survey, no response rate.	prevalence dysmenorrhoea =79.7%
Age at Menarche and Menstrual Cycle Pattern among School Adolescent Girls in Central India	Dr. Dharampal G. Dambhare, Dr. Sanjay V. Wagh, Dr. Jayesh Y. Dudhe	2012	India	561 secondary school students (390 urban, 171 rural) , mean age=15.45	cross-sectional survey in school, 6 schools (3 rural, 3 urban), 1100 surveys distributed, 1080 returned but 519 not yet attained menarche so not included)	prevalence dysmenorrhoea =56.2%
Menstrual abnormalities and their association with lifestyle pattern in adolescent girls of Garhwal, India	Priyanka Negi, Aprajita Mishra, Pramesh Lakhera	2018	India	school based study, no detail about how many schools or how selected, N=470, mean age =not given	cross-sectional questionnaire study, response rate not reported	prevalence dysmenorrhoea 62.8%
Relation Between Dysmenorrhea and Body Mass Index in Adolescents with Rural Versus Urban Variation	Chauhan Madhubala, Kala Jyoti	2012	India	400 school students, 200 from a rural setting and 200 from an urban setting, age range 12-18	cross-sectional questionnaire study and anthropometric measurements	prevalence dysmenorrhoea 78.8%
Menstrual Abnormalities in School Going Girls – Are They Related to Dietary and Exercise Pattern?	Rupa vani K., veena K.S. , Subitha L. , hemanth Kumar VR , Bupathy a	2013	India	853 school students from 4 schools, aged 11-17	cross-sectional questionnaire study and anthrpompetric data collection, response rate 100% (8 excluded for medical reasons from 861 leaving 853 participants)	prevalence dysmenorrhoea = 72.8%
Problems Related to Menstruation Amongst Adolescent Girls	Pragya Sharma, Chetna Malhotra, D.K. Taneja, Renuka Saha	2008	India	198 adolescent girls from two slum areas, mean age 16.2	cross-sectional questionnaire study, 204 included but 6 excluded (2 not meeting study criterion re menarche and 4 lost to follow up)	prevalence dysmenorrhea =67.2%
Menstrual problems in adolescence: relationship to serum vitamins A and E, and systemic inflammation	Afsane Bahrami, Hamidreza Bahrami‑Taghanaki, Zahra Khorasanchi, Ameneh Timar, Najmeh Jaberi, Ehsaneh Azaryan, Maryam Tayefi, Gordon A. Ferns, Hamid Reza Sadeghnia, Majid Ghayour‑Mobarhan	2019	Iran	897 school students from 2 cities, mean age 14.6	cross-sectional study, questionnaires and laboratory blood measurements	prevalence dysmenorrhoea=67.7%	Iran: Studies=1, N=897, prevalence 68%, reference 30
The Association Between Somatization and Perceived Ability: Roles in Dysmenorrhea Among Israeli Arab Adolescents	Goldsterin-Ferber, Granot	2005	Israel	160 nonmarried Israeli Arab adolescents from high school grade 10 and 11, from three subgroups: Muslims (50), Christians (50), and Druze (60). Mean age 15.7	cross-sectional questionnaire study, no response rate reported	prevalence dysmenorrhoea 80.6%	Israel: Studies=1, prevalence =81%, reference 31
Inﬂuence of menstrual factors and dietary habits on menstrual pain in adolescence age	Carlo Balbi, Rosalia Musone, Agostino Menditto, Luigi Di Prisco, Eufemia Cassese, Maurizio D’Ajello, Domenico Ambrosio, Antonio Cardone	2000	Italy	356 students from a professional institute from one city	Observational study: questionnaires, anthropmetiric data, ultrasound scan (hormone assay if concerns after this)	prevalence dysmenorrhoea=85%	Italy: studies=1, N=356, prevalence 85%, reference 32
The Relationship between Premenstrual Symptoms, Menstrual Pain, Irregular Menstrual Cycles, and Psychosocial Stress among Japanese College Students	Kazuhiko Yamamoto, Ai Okazaki, Yoko Sakamoto, Michiko Funatsu	2009	Japan	221 college students, mean age 19.4 years	cross-sectional questionnaire study. 221/264 willing participants were eligible as they completed full data	prevalence dysmenorrhoea=79%	Japan: studies=3, N=2,535, prevalence 65-85%, reference 33-35
Relationship between premenstrual symptoms and dysmenorrhea in Japanese high school students	Mari Kitamura, Takashi Takeda, Shoko Koga, Satoru Nagase, Nobuo Yaegashi	2012	Japan	1,296 high school students from 2 schools, mean age 16.7	cross-sectional questionnaire study, No response rate, 1,431 completed questionnaire, 135 excluded for incomplete data	prevalence dysmenorrhoea=85%
Prevalence of Dysmenorrhea and Its Correlating Lifestyle Factors in Japanese Female Junior High School Students	Mie Kazama, Keiko Maruyama, Kazutoshi Nakamura	2015	Japan	1018 junior high school students from 28 schools mean age 14.3	Cross-sectional questionnaire study. 1167/2819 students participated. Excluded 94 pre-menarche, 42 with incomplete data and 14 whose BMI was outside study range (11.9 and 27.7)	prevalence moderate and severe dysmenorrhoea=64.5
Age at menarche, menstrual patterns, and menstrual characteristics in Jordanian adolescent girls	Bata	2012	Jordan	596 secondary school students in government schools, mean age 15.7	cross-sectional study, response rate not reported.	prevalence dysmenorrhoea = 37.6%	Jordan: studies=1, N=596, prevalence 38%, reference 36
Factors Influencing the Dysmenorrhea among Korean Adolescents in Middle School	Ga Eul Jeon, Nam Hyun Cjaa, Sohyune R. Sok	2014	Korea	572 middle school students from three schools, mean age 13.53	cross-sectional study, responserate 772/820=94%), but only 572 had complete data and were included	prevalence dysmenorrhoea 87.2%	Korea: studies=2, N=1,110, prevalence 74-82%, reference 37,38
A study on the menstruation of Korean adolescent girls in Seoul	Jin Chul Lee, Jung Hye Byeon, Jung Hye Min, Byung Keun Yu, Kee-Hyoung Lee, Sang Hee Park	2010	Korea	538 Middle-high school students aged 14-18 (mean age 16.1) who visited a paedistrics clinic between July and Movember 2007.	cohort study, no mention of response rate	82% reported dysmenorrhoea
Secondary School Girls’ Experiences of Menstruation and Awareness of Endometriosis: A Cross-Sectional Study among Lebanese female adolescents	T. Santina, N. Wehbe, F. Ziade	2011	Lebanon	389 high school students from 5 schools, mean age =15.8	cross-sectional questionnaire study, response rate 97.7%	prevalence dysmenorrhoea 74.3%	Lebanon: studies=1, N=389, prevalence= 74%, reference 39
Menstruation among adolescent girls in Malaysia: a cross-sectional school survey	Lee L K, Chen P C Y, Lee K K, Kaur J	2006	Malaysia	2411 secondary school students from 14 schools, mean age=15.4	cross-sectional questionnaire study, no documented response rate (completed in school).	Dysmenorrhoea was reported by 67.7% of the girls.	Malaysia: Studies=3, N=4,798, prevalence =68-76%, reference 40-42
Attitudes towards dysmenorrhoea, impact and treatment seeking among adolescent girls: A rural school-based survey	Li Ping Wong	2011	Malaysia	1295 school students from 16 schools, mean age=15.3	cross-sectional questionnaire study, response rate 100%	prevalence dysmenorrhoea =76%
Dysmenorrhea in a multiethnic population of adolescent Asian girls	Li Ping Wong, Ee Ming Khoo	2010	Malaysia	1092 students from 15 public schools, mean age 15.2	cross-sectional questionnaire study, 15/94 schools agreed to particiapte, no other response rate reported	prevalence dysmenorrhoea 74.5%
Prevalence and impact ofprimary dysmenorrhea among Mexican high school students	Mario I. Ortiz, Eduardo Rangel-Flores, Lourdes C. Carrillo-Alarcón, Humberto A. Veras-Godoy	2009	Mexico	1152 secondary school students, mean age =18.2	cross-sectional questionnaire study, response rate not reported	Prevalence dysmenorrhoea 48.4%	Mexico: Studies=1, N=1152, prevalence =48%, reference 43
Prevalence and predictors of dysmenorrhea among a population of adolescent’s schoolgirls (Morocco)	Siham Lghoul, Mohamed Loukid, Mohamed Kamal Hilali	2020	Morocco	364 students from 5 schools, mean age 16.65	cross-sectional questionnaure study, no response rate reported.	prevalence of dysmenorrhoea =78%	Morocco: studies=2, N=859, prevalence = 70-78%, reference 44,45
Characteristics of menstrual cycles in Moroccan girls: prevalence of dysfunctions and associated behaviours	P. MONTERO,, C. BERNIS,, M. LOUKID,, K. HILALI, & A. BAALI	1999	Morocco	495 school students aged12-18	cross sectional questionnaire study, no response rate reported	prevalence of dysmenorrhoea =69.6%
Knowledge and practices regarding menstruation among school going adolescents of rural Nepal.	Sapkota D, Sharma D, Pokharel HP, Budhathoki SS, Khanal VK.	2013	Nepal	61 adolescents from one school, mean age 15.3	cross-sectional questionnaire, response rate not reported	prevalence dysmenorrhoea = 78.7%	Nepal: studies=1, N=61, prevalence = 79%, reference 46
A study on the menstrual patterns of adolescents in Ile-Ile Nigeria	K.D. Thomas, F.E. Okonofua, 0. Chibokaba	1990	Nigeria	768 University students, mean age = 19.5	cross-sectional questionnaire study, no response rate reported.	prevalence dysmenorrhoea =72.3%	Nigeria: Studies =4, N=3,256, prevalence 64-82%, reference 47-50
Dysmenorrhoea and menstrual abnormalities among postmenarcheal secondary school girls in Maiduguri Nigeria	Jacks, T.H., Obed, J.Y., Agida, E.T., Petrova, G.V.	2005	Nigeria	415 school students from 6 schools, mean age = 15.2	cross-sectional questionnaire study, 657 girls selected but 212 were pre-menarchal leaving 415.	prevalence dysmenorrhoea 64%
Age at menarche, menstrual characteristics, and its associated morbidities among secondary school students in Abakaliki, southeast Nigeria	Chidebe C. Anikwe, Johnbosco E. Mamah, Bartholomew C. Okorochukwu, Ugochukwu U. Nnadozie, Chukwuemeka H. Obarezi, Kenneth C. Ekwedigwe	2020	Nigeria	400 students from 7 schools, mean age 16	cross-sectional questionnaire study, response rate 450 responses from populatoin of 960 and 400 eligible (post menarcheal)	prevalence of dysmenorrhoea 82%, school absence 56.5%
Menstrual characteristics of secondary school girls in Ibadan, Nigeria.	A.O.Fawole* I. A.Babarinsa, O. I.Fawole' K. A.Obisesan, O.A.Ojengbede	2009	Nigeria	1,673 adolescents recruited from 15 schools, 1,213 post-menarcheal reported here, age range 9-23	cross-sectional questionnaire study, response rate not reported	prevalence of dysmenorrhoea = 72.7%
Prevalence and Impact of Dysmenorrhoea among Omani High School Students	Rahma Al-Kindi, Anbarin Al-Bulushi	2011	Oman	404 secondary school students from two randomly selected high schools, mean age 17.5	Cross-sectional study, no response rate reported.	prevalence dysmenorrhoea =94%	Oman: studies=1, N=404, prevalence 94%, reference 51
Prevalence of dysmenorrhea and predictors of its pain intensity among Palestinian female university students	Heba A. Abu Helwa, Areen A. Mitaeb, Suha Al-Hamshri, Waleed M. Sweileh	2018	Palestine	956 university students, average age 19.7.	cross-sectional survey, 80% response rate, randomly distributed	prevalence dysmenorrheoa=85.1%	Palestine: studies=1, N=956, prevalence 85%, reference 52
Epidemiology of dysmenorrhea among secondary-school students in Northern Saudi Arabia.	Abd El-Mawgod MM, Alshaibany AS, Al-Anazi AM	2016	Saudi Arabia	344 adolescents recruited from 4 schools in 1 city, mean age 16.2	cross-sectional questionnaire study, response rate not reported	prevalence dysmenorrhoea=74.4%	Saudi Arabia: studies=1, N=344, prevalence 74%, reference 53
Questionnaire Study on Menstrual Disorders in Adolescent Girls in Singapore	Anupriya Agarwal, Annapoorna Venkat	2009	Singapore	5,561 girls, ages ranging from 12 to 19 years (mean age 15.9)	cross-sectional survey, 10,303 surveys distributed, 7730 returned, 5561 included in analysis	prevalence dysmenorrhoea =83.2%	Singapore: studies=1, N=5,561, prevalence =82%, reference 54
Knowledge and attitudes towards dysmenorrhea among adolescent girls in an urban school in Sri Lanka	Hapuarachchige Sewvandi, Maliga Sampath, Kumari Wijesiri, Thusharie Sugandhika Suresh	2013	Sri Lanka	200 year 12 students in school, mean age =17-18	cross-sectional questionnaire study, study reports all year 12 students participated	prevalence dysmenorrhoea=84%	Sri Lanka: Studies=1, N= 200, prevalence =84%, reference 55
Prevalence and Correlation between Diet and Dysmenorrhea among High School and College Students in Saint Vincent and Grenadines	Ifure Monday, Precious Anthony, Esther Olunu, David Otohinoyi, Silas Abiodun, Akinyomade Owolabi, Blessing Mobolaji, Adegbenro Omotuyi John Fakoya	2019	St Vincent and Grenadine	478 females from high school and college participated, age range 11-55 81.74% were <20	cross-sectional questionnaire study, response rate 539/600=90%, 61 excluded because of pelvic pathology	prevalence dysmenorrhoea 45.5%	St Vincent and Grenadine: Studies =1, N=478, prevalence 45%, reference 56
Dysmenorrhea During Adolescence	Widholm	1979	Sweden	adolescent girls surveyed in 1971 N=5485, second survey to school girls 1978 N=331	cross-sectional survey	prevalence dysmenorrhoea 26.5% study 1 at age 17-20, second study 36% aged 13-14, 56.5% aged 17-10	Sweden: studies=3, N=7,772, prevalence 27-89%, references 57-59
Prevalence and impact of dysmenorrhea in Swedish adolescents	Lisa Söderman, Måns Edlund, Lena Marions	2018	Sweden	1785 adolescents born in 2000, mean age 16.2	cross-sectional study, web-based questionnaire, 45% response rate	prevalence dysmenorrhoea 89%
The Incidence of Primary Dysmenorrhea in Teenagers	Lars Svanberg, Ulf Ulmsten	1981	Sweden	502 school students in one city, mean age 15	cross-sectional questionnaire study, no response rate reported	prevalence dysmenorrhoea 43%
Body Dissatisfaction on Top of Depressive Mood among Adolescents with Severe Dysmenorrhea	Anne-Emmanuelle Ambresin, Richard E. Belanger, Catherine Chamay, Andre Berchtold, Francoise Narring	2012	Switzerland	3340 adolescents as part of an established cohort, 2926 with no/mild/moderate dysmenorrhoea (mean age 17.83), 414 with severe dysmenorrhoea (mean age 17.98)	cross-sectional questionnaire study within a nationally representative cohort (SMASH 2002)	prevalence dysmenorhoea =86.6%	Switzerland: Studies=1, N=3340, prevalence 87%, reference 60
Factors that affect self-care behaviour offemale high school students with dysmenorrhoea: A cluster sampling study	Shu-Fang Chang, Mei-hua Chuang	2012	Taiwan	603 high school students, grades 1-3	Cross-sectional questionnaire study, valid response rate 98.85%	prevalence of dysmenorrhoea =84.7%	Taiwan: Studies=2, N=1,363, prevalence 73-85%, reference 61,62
Predictors of Dysmenorrhea and Self-Care Behavior Among Vocational Nursing School Female Students	Miin-Huey Chiou, Hsiu-Hung Wang	2008	Taiwan	760 freshman vocational nursing students, mean age 16.7	cross-sectional study, 94% of those who agreed to participate completed the questionnaires.	prevalence dysmenorrhoea 73.3%
Dysmenorrhoea and coping strategies among secondary school adolescents in Ilala district, Tanzania	AB Pembe NT Ndolele	2014	Tanzania	880 students from 8 schools in 1 district	NOTE abstract only: cross-sectional study, no further detail available	prevalence dysmenorrhoea=74.1%	Tanzania: studies=1, N=880, prevalence 74%, reference 63
Dysmenorrhea in Thai Adolescents:Prevalence, Impact and Knowledge of Treatment	Kamonsak Tangchai, Vitaya Titapant, Dittakarn Boriboonhirunsarn	2004	Thailand	789 university students aged 16-19, mean age 18.9	cross-sectional questionnaire study, response rate 98%	prevalence dysmenorrhoea=84.2%	Thailand: Studies=1, N=789, prevalence 84%, reference 64
Dysfunctional Uterine Bleeding and Other Menstrual Problems of Secondary School Students in Adana, Turkey	S. Cansun Demir, T. Oktay Kadayy´fc¸y´, M. Ali Vardar, Yılmaz Atay	2000	Turkey	3000 school students from 8 high schools, mean age 15.8	cross-sectional study, no response rate reported.	prevalence dysmenorrhoea=38.7%	Turkey: studies=6, N=22,903, prevalence 39-92%, references 65-70
Evaluation of Menstrual Pain Management Approaches by Northeastern Anatolian Adolescents	Gulsen Eryilmaz, Funda Ozdemir	2006	Turkey	selected from 8 high schools, 1408 students with dysmen (543 did not), average age 16.05	cross-sectional study, response rate not reported,	prevalence dysmenorrhoea=81.7%
Dysmenorrhea Prevalence among Adolescents in Eastern Turkey: Its Effects on School Performance and Relationships with Family and Friends	Gulsen Eryilmaz, Funda Ozdemir, Turkan Pasinlioglu	2010	Turkey	selected from 8 high schools, 1951 school students, age 13-18, mean age 16	cross-sectional study, response rate not reported,	prevalence dysmenorrhoea 68.1-72.2%
Menstrual Characteristics of Pubertal Girls: A Questionnaire-Based Study in Turkey	İhsan Esen, Baran Oğuz, Hepsen Mine Serin	2016	Turkey	selected from 6 high schools, 879 secondary school students, median age 16.2	cross-sectional study, response rate 879/1256=70%	prevalence dysmenorrhoea=92%
Demographic and Epidemiologic Features of Female Adolescents in Turkey	KUBILAY VICDAN, SELAHATTIN KUKNER, TULIN DABAKOGLU, TOLGA ERGIN, GURHAN KELE, OYA GOKMEN	1996	Turkey	13,665 school students aged 13-18 year old, mean age 15.9	cross-sectional questionnaire study conducted in school, no response rate reported,	prevalence dysmenorrhoea 78.1%
Menstrual Characteristics and Related Problems in 9- to 18-Year-Old Turkish School Girls	Gul Yucel, Mustafa Kendirci, Ulku Gul	2018	Turkey	2000 school students from 13 schools, mean age 13.5	cross-sectional questionnaire study, no response rate reported	prevalence dysmenorrhoea 84.8%
Is exercise associated with primary dysmenorrhoea in young women?	H Blakey, C Chisholm, F Dear, B Harris, R Hartwell, AJ Daley, K Jolly	2009	UK	580 University students, mean age 19.3	Cross-sectional questionnaire study, response rate 91.3%	prevalence dysmenorrhoea=78.1%	UK: Studies=3, N=3,203, prevalence 77-94%, reference 71-73
Smoking and menstrual problems in 16-year-olds	Charlton, While	1996	UK	2181 young women aged 16-18 in 1986	questionnaire study within an established cohort study (The British Birth Cohort Study BCS70)	prevalence dysmenorrhoea=77%
Secondary School Girls’ Experiences of Menstruation and Awareness of Endometriosis: A Cross-Sectional Study	A.E. Randhawa, A.D. Tufte-Hewett, A.M. Weckesser, G.L. Jones, F.G. Hewett	2021	UK	442 secondary school students, age 15-19 (median 17)	cross-sectional descriptive questionnaire study, response rate 53%	prevalence dysmenorrhoea 93.6%
Prevalence and Impact of Dysmenorrhea on Hispanic Female Adolescents	Chantay Banikarim, Mariam R. Chacko, Steve H. Kelder	2000	USA	706 Hispanic students in USA high school, mean age = 16	cross-sectional study, response rate 70.6%	prevalence dysmenorrhoea=85%	USA: Studies=6, N=20,262, prevalence 60-85%, references 74-49
The incidence of dysmenorrheoa in High School Girls	Golub, Lang, Menduke	1958	USA	16,183 school girls from 16 public high schools, mean age not reported	cross-sectional survey study, 90% of the girls attending the participating schools were questioned	prevalence dysmenorrhoea = 67.6%
Epidemiology of Adolescent Dysmenorrhea	Klein and Litt	1981	USA	2,699 menarcheal adolescents, drawn from a national probability sample of 12- to 17-year-old girls (the National Health Examination Survey),	cross-sectional study, questionnaires, examination by health professional, laboratory and psychology test variables, embedded study within an existing cohort	prevalence dysmenorrhea=59.7%
Longitudinal Study of Risk Factors for Occurrence, Duration and Severity of Menstrual Cramps in a Cohort of College Women	Harlow SD, Park M	1996	USA	165 university students aged 17-19	prospective menstrual diary study, 165/563 eligible participants	prevalence dysmenorrhoea 71.6%
Level of knowledge amongst adolescent girls regarding effective treatment for dysmenorrhoea	Johnson	1988	USA	182 high school students from 2 schools, mean age 15.8	cross-sectional questionnaire survey, response rate not reported	prevalence dysmenorrhoea= 73%
The Relationships of Calculated Percent Body Fat, Sports Participation, Age, and Place of Residence on Menstrual Patterns in Healthy Adolescent Girls at an Independent New England High School	Wilson, C., Emans, S.J., Mansfield, J., Podolsky, C. and Grace, E.	1984	USA	327 high school students (private day and boarding school), mean age at study entry 15.5	prospective questionnaire study, questionnaire and anthropometric data recorded at entry to school then three follow on menstrual calenders and questionnaires,	prevalence dysmenorrhea= 59.7%
