# Supplementary material for: What is known about adolescent dysmenorrhoea in (and for) community health settings?
Source: Front Reprod Health. 2024 Jul 23;6:1394978. doi: 10.3389/frph.2024.1394978 (PMC11300274; doi:10.3389/frph.2024.1394978)
Supplement: Supplementary file 3 [file Table3.xlsx]

## Sheet: Sheet1
Appendix C: Figure 3 and figure 4: references for prevalence maps showing percentage of young people who had seen a healthcare professional or missed school or work due to menstrual pain.
Title	authors	year	country	population	method	percentage who had seen a health care professional (HCP)	Percentage who missed school or work because of menstrual pain
Primary Dysmenorrhea in Young Western Australian Women: Prevalence, Impact, and Knowledge of Treatment	Hillen TI, Grbavac SL, Johnston PJ, Straton JA, Keogh JM.	1999	Australia	388 school students from 3 schools questionnaire in school time, age 15-17	cross-sectional questionnaire study, completed in school, response rate 388/389 (384 post-menarchal)	18% had seen a HCP	37% missed school or work
The menstrual disorder of teenagers (MDOT) study: determining typical menstrual patterns and menstrual disturbance in a large populationbased study of Australian teenagers	MA Parker, AE Sneddon, P Arbon	2009	Australia	1051 school students across 4 schools, mean age 16 years, 10 months	cross-sectional questionnaire study conducted in school, response rate 98%	33% had seen a HCP	26% missed school or work
The Prevalence and Educational Impact of Pelvic and Menstrual Pain in Australia: A National Online Survey of 4202 Young Women Aged 13-25 Years	Mike Armour, Tania Ferfolja, Christina Curry, Mikayla S. Hyman, K. Jane Chalmers, Caroline A. Smith, Freya MacMillan, Kathryn Holmes	2020	Australia	4202 school (2421) and university (1781) students, median age 17	cross-sectional study, online questionnaire	not recorded	35% missed school or work
Menstruation Disturbances: Prevalence, Characteristics, and Effects on the Activities of Daily Living among Adolescent Girls from Brazil	Ana Carolina R. Pitangui, Mayra Ruana de A. Gomes, Alaine Souza Lima, Paulo Adriano Schwingel, Ana Paula dos S. Albuquerque, Rodrigo Cappato de Araujo	2013	Brazil	205 school students, mean age 13.7	cross-sectional questionnaire study, total available sampling frame 584	28% had seen a HCP	31% missed school or work
Use of Medication by Adolescents for the Management of Menstrual Discomfort	Campbell, McGrath	1997	Canada	289 adolescents recruited from one school, mean age 16.3	cross-sectional questionnaire study, response rate 80%, 18 responses not included (10 no parental consent, 7 patients with secondary dysmenorrhoea, 1 participant with Crohn's disease, 2 pre-menarcheal)	18% used prescription medication for menstrual pain	not recorded
Anthropological and Clinical Characteristics in Adolescent Women with Dysmenorrhea	Tomislav Strinic, Damir Bukovic, Ljubomir Pavelic, Josip Fajdic, Ivan Herman, Ivica Stipic, Ivan Palada, Ivana Hirs	2003	Croatia	297 school students, mean age not reported	cross-sectional questionnaire study, response rate 92%	not recorded	12% missed school or work
Epidemiology of dysmenorrhoea among adolescent students in Mansoura, Egypt	A-H. El-Gilany, K. Badawi, S. El-Fedawy	2005	Egypt	664 high school students from government schools, mean age 15	cross-sectional study, 95.7% response rate	3% had seen a HCP	20% missed school or work
Nature and Prevalence of Menstrual Disorders among Teenage Female Students at Zagazig University, Zagazig, Egypt	Ahmed M. Nooh, Atiea Abdul-Hady, Nadia El-Attar	2016	Egypt	285 First year university students recruited from pre-enrollment medical, mean age 17.7	cross-sectional questionnaire study, recruitment to a pre-determined sample size of 283.	13% had seen a HCP	not recorded
Prevalence of primary dysmenorrhea, its intensity, impact and associated factors among female students’ at Gondar town preparatory school, Northwest Ethiopia	Abere Woretaw Azagew, Destaye Guadie Kassie, Tarkie Abebe Walle	2020	Ethiopia	459 secondary school students most <18 from three preparatory (high schools)	cross-sectional study, response rate 96.29%	not recorded	65% missed school or work
Age at menarche and the menstrual pattern of secondary school adolescents in northwest Ethiopia	Desalegn Tegabu Zegeye, Berihun Megabiaw, Abay Mulu	2009	Ethiopia	612 school students from 2 schools, mean age 16.4	cross-sectional questionnaire study, 612/622 pupils enrolled completed the questionnaire	11% had seen a HCP	31% missed school or work
Menstrual pain, health and behaviour in girls	Teperi, Rimpela	1989	Finland	3370, 12-18 year olds born in Finland in July 1964,1966, 1968, 1970	cross-sectional questionnaire study, embedded in existing cohort, response rate 87%	not recorded	21% missed school or work
Prevalence of Pain Symptoms Suggestive of Endometriosis Among Finnish Adolescent Girls (TEENMAPS Study)	P.A. Suvitie, M.K. Hallamaa, J.M. Matomaki, J.I. Makinen, A.H. Perheentupa	2016	Finland	1103 school students in Finland, mean age 16.8	cross-sectional questionnaire study, response rate 43% (significant variation between schools and cities)	53% of the 49 respondents with severe dysmenorrhoea had visited a Dr, not reported for whole sample	8% of total sample, 49.9% of those with dysmenorrhoea
Primary dysmenorrhea: prevalence in adolescent population of Tbilisi, Georgia and risk factors	Tinatin Gagua, Besarion Tkeshelashvili, David Gagua	2012	Georgia	Cross sectional study 2561 adolescents recruited in schools. Embedded case control study of 431 students (148 no dysmneonorrhoea mean age 15.55, 276 with dysmenorrhoea, mean age 16.03)	cross sectional study: 2561/2890 agreed to participate. Nested case-control study	not recorded	70% missed school or work
Menstrual problems and health-seeking behaviour in Hong Kong Chinese girls	Symphorosa SC Chan, KW Yiu, PM Yuen, DS Sahota, Tony KH Chung	2009	Hong Kong	Chinese students in Hong Kong, 10 secondary schools, N=5609, mean age 15.1	cross-sectional study, 10/20 schools approached agreed to participate, of the students approached, 96.5% response rate	6% had seen a HCP	12% missed school or work
Health-related quality of life among Chinese adolescent girls with Dysmenorrhoea	Lee Wong	2018	Hong Kong	653 school students from three schools, mean age 15.7	cross-sectional questionnaire study, response rate: of 6 schools approached, 3 agreed to participate	7% had seen a HCP	16% missed school or work
Age at Menarche and Menstrual Cycle Pattern among School Adolescent Girls in Central India	Dr. Dharampal G. Dambhare, Dr. Sanjay V. Wagh, Dr. Jayesh Y. Dudhe	2012	India	561 secondary school students (390 urban, 171 rural) , mean age=15.45	cross-sectional survey in school, 6 schools (3 rural, 3 urban), 1100 surveys distributed, 1080 returned but 519 not yet attained menarche so not included)	not recorded	25% missed school or work
Menstrual abnormalities and their association with lifestyle pattern in adolescent girls of Garhwal, India	Priyanka Negi, Aprajita Mishra, Pramesh Lakhera	2018	India	school based study, no detail about how many schools or how selected, N=470, mean age =not given	cross-sectional questionnaire study, response rate not reported	not recorded	35% missed school or work
How do school girls deal with dysmenorrhoea?	Chaudhari, Singh	2012	India	224 school students recruited from 2 schools, mean age of 128 students with dysmenorrhoea = 14.2	cross-sectional questionnaire study, no response rate reported	8.6% had seen a HCP	25.8% missed school or work
Problems Related to Menstruation Amongst Adolescent Girls	Pragya Sharma, Chetna Malhotra, D.K. Taneja, Renuka Saha	2008	India	198 adolescent girls from two slum areas, mean age 16.2	cross-sectional questionnaire study, 204 included but 6 excluded (2 not meeting study criterion re menarche and 4 lost to follow up)	4% had seen a HCP	17% missed school or work
Practices and perceptions of adolescent girls regarding the impact of dysmenorrhea on their routine life: a comparative study in the urban, rural, and slum areas of Chandigarh	Alka Rani, Manoj Kumar Sharma, Amarjeet Singh	2015	India	300 adolescents from three areas (urbal, rural, slum) in one region, aged 11-18	cross-sectional study including questionnaires and interview.	11% had seen a HCP	45% missed school or work
Relation Between Dysmenorrhea and Body Mass Index in Adolescents with Rural Versus Urban Variation	Chauhan Madhubala, Kala Jyoti	2012	India	400 school students, 200 from a rural setting and 200 from an urban setting, age range 12-18	cross-sectional questionnaire study and anthropometric measurements	not recorded	17% missed school or work
Age at menarche, menstrual patterns, and menstrual characteristics in Jordanian adolescent girls	Bata	2012	Jordan	596 secondary school students in government schools, mean age 15.7	cross-sectional study, response rate not reported.	not recorded	8% missed school or work
A study on the menstruation of Korean adolescent girls in Seoul	Jin Chul Lee, Jung Hye Byeon, Jung Hye Min, Byung Keun Yu, Kee-Hyoung Lee, Sang Hee Park	2010	Korea	538 Middle-high school students aged 14-18 (mean age 16.1) who visited a paedistrics clinic between July and Movember 2007.	cohort study, no mention of response rate	0.4% Oriental practitioner, 0.1% saw a western HCP
Exploring dysmenorrhoea and menstrual experiences among Lebanese female adolescents	T. Santina, N. Wehbe, F. Ziade	2011	Lebanon	389 high school students from 5 schools, mean age =15.8	cross-sectional questionnaire study, response rate 97.7%	7% had seen a HCP	41% missed school or work
Menstruation among adolescent girls in Malaysia: a cross-sectional school survey	Lee L K, Chen P C Y, Lee K K, Kaur J	2006	Malaysia	2411 secondary school students from 14 schools, mean age=15.4	cross-sectional questionnaire study, no documented response rate (completed in school).	11% had seen a HCP	7% missed school or work
Attitudes towards dysmenorrhoea, impact and treatment seeking among adolescent girls: A rural school-based survey	Li Ping Wong	2011	Malaysia	1295 school students from 16 schools, mean age=15.3	cross-sectional questionnaire study, response rate 100%	14.8% had seen a HCP	18% frequently missed school or work
Dysmenorrhea in a multiethnic population of adolescent Asian girls	Li Ping Wong, Ee Ming Khoo	2010	Malaysia	1092 students from 15 public schools, mean age 15.2	cross-sectional questionnaire study, 15/94 schools agreed to particiapte, no other response rate reported	12% had seen a HCP	21.5% missed school or work
Prevalence and impact ofprimary dysmenorrhea among Mexican high school students	Mario I. Ortiz, Eduardo Rangel-Flores, Lourdes C. Carrillo-Alarcón, Humberto A. Veras-Godoy	2009	Mexico	1152 secondary school students, mean age =18.2	cross-sectional questionnaire study, response rate not reported	13% had seen a HCP (28% of those with dysmenorrhoea)	11.6% missed school (24% of those with dysmenorrhoea)
Prevalence and predictors of dysmenorrhea among a population of adolescent’s schoolgirls (Morocco)	Siham Lghoul, Mohamed Loukid, Mohamed Kamal Hilali	2020	Morocco	364 students from 5 schools, mean age 16.65	cross-sectional questionnaure study, no response rate reported.	10% had seen a HCP	13% missed school or work
Characteristics of menstrual cycles in Moroccan girls: prevalence of dysfunctions and associated behaviours	P. MONTERO,, C. BERNIS,, M. LOUKID,, K. HILALI, & A. BAALI	1999	Morocco	495 school students aged12-18	cross sectional questionnaire study, no response rate reported	6% had seen a HCP	6% missed school or work
Age at menarche, menstrual characteristics, and its associated morbidities among secondary school students in Abakaliki, southeast Nigeria	Chidebe C. Anikwe, Johnbosco E. Mamah, Bartholomew C. Okorochukwu, Ugochukwu U. Nnadozie, Chukwuemeka H. Obarezi, Kenneth C. Ekwedigwe	2020	Nigeria	400 students from 7 schools, mean age 16	cross-sectional questionnaire study, response rate 450 responses from populatoin of 960 and 400 eligible (post menarcheal)	0% had seen a HCP	56.5% missed school or work
Prevalence and Impact of Dysmenorrhoea among Omani High School Students	Rahma Al-Kindi, Anbarin Al-Bulushi	2011	Oman	404 secondary school students from two randomly selected high schools, mean age 17.5	Cross-sectional study, no response rate reported.	3% had seen a HCP	45% missed school or work
Prevalence of dysmenorrhea and predictors of its pain intensity among Palestinian female university students	Heba A. Abu Helwa, Areen A. Mitaeb, Suha Al-Hamshri, Waleed M. Sweileh	2018	Palestine	956 university students, average age 19.7.	cross-sectional survey, 80% response rate, randomly distributed	None had seen a HCP	31.1% missed school or work
Epidemiology of dysmenorrhea among secondary-school students in Northern Saudi Arabia.	Abd El-Mawgod MM, Alshaibany AS, Al-Anazi AM	2016	Saudi Arabia	344 adolescents recruited from 4 schools in 1 city, mean age 16.2	cross-sectional questionnaire study, response rate not reported	18% had seen a HCP	50.8% had missed work or school
Questionnaire Study on Menstrual Disorders in Adolescent Girls in Singapore	Anupriya Agarwal, Annapoorna Venkat	2009	Singapore	5,561 girls, ages ranging from 12 to 19 years (mean age 15.9)	cross-sectional survey, 10,303 surveys distributed, 7730 returned, 5561 included in analysis	13% had seen a HCP	24% missed school or work
Knowledge and attitudes towards dysmenorrhea among adolescent girls in an urban school in Sri Lanka	Hapuarachchige Sewvandi, Maliga Sampath, Kumari Wijesiri, Thusharie Sugandhika Suresh	2013	Sri Lanka	200 year 12 students in school, mean age =17-18	cross-sectional questionnaire study, study reports all year 12 students participated	13% had seen a HCP	44% missed school or work
Prevalence and impact of dysmenorrhea in Swedish adolescents	Lisa Söderman, Måns Edlund, Lena Marions	2018	Sweden	1785 adolescents born in 2000, mean age 16.2	cross-sectional study, web-based questionnaire, 45% response rate	7% saw Dr, 33% school nurse	14% missed school or work
The Incidence of Primary Dysmenorrhea in Teenagers	Lars Svanberg, Ulf Ulmsten	1981	Sweden	502 school students in one city, mean age 15	cross-sectional questionnaire study, no response rate reported	not recorded	37% missed school or work
Predictors of Dysmenorrhea and Self-Care Behavior Among Vocational Nursing School Female Students	Miin-Huey Chiou, Hsiu-Hung Wang	2008	Taiwan	760 freshman vocational nursing students, mean age 16.7	cross-sectional study, 94% of those who agreed to participate completed the questionnaires.	21% had seen a HCP	9% missed school, 34% physical training
Dysmenorrhea in Thai Adolescents:Prevalence, Impact and Knowledge of Treatment	Kamonsak Tangchai, Vitaya Titapant, Dittakarn Boriboonhirunsarn	2004	Thailand	789 university students aged 16-19, mean age 18.9	cross-sectional questionnaire study, response rate 98%	7% had seen a HCP	21% missed school or work
Dysfunctional Uterine Bleeding and Other Menstrual Problems of Secondary School Students in Adana, Turkey	S. Cansun Demir, T. Oktay Kadayy´fc¸y´, M. Ali Vardar, Yılmaz Atay	2000	Turkey	3000 school students from 8 high schools, mean age 15.8	cross-sectional study, no response rate reported.	4.7% had seen a HCP	not recorded
Evaluation of Menstrual Pain Management Approaches by Northeastern Anatolian Adolescents	Gulsen Eryilmaz, Funda Ozdemir	2006	Turkey	selected from 8 high schools, 1408 students with dysmen (543 did not), average age 16.05	cross-sectional study, response rate not reported,	9% had seen a HCP	not recorded
Dysmenorrhea Prevalence among Adolescents in Eastern Turkey: Its Effects on School Performance and Relationships with Family and Friends	Gulsen Eryilmaz, Funda Ozdemir, Turkan Pasinlioglu	2010	Turkey	selected from 8 high schools, 1951 school students, age 13-18, mean age 16		not recorded	19% missed school or work
Menstrual Characteristics of Pubertal Girls: A Questionnaire-Based Study in Turkey	İhsan Esen, Baran Oğuz, Hepsen Mine Serin	2016	Turkey	selected from 6 high schools, 879 secondary school students, median age 16.2	cross-sectional study, response rate 879/1256=70%	1% had seen a HCP	28% missed school or work
Demographic and Epidemiologic Features of Female Adolescents in Turkey	KUBILAY VICDAN, SELAHATTIN KUKNER, TULIN DABAKOGLU, TOLGA ERGIN, GURHAN KELE, OYA GOKMEN	1996	Turkey	13,665 school students aged 13-18 year old, mean age 15.9	cross-sectional questionnaire study conducted in school, no response rate reported,	10% had seen a HCP	26% missed school or work
Menstrual Characteristics and Related Problems in 9- to 18-Year-Old Turkish School Girls	Gul Yucel, Mustafa Kendirci, Ulku Gul	2018	Turkey	2000 school students from 13 schools, mean age 13.5	cross-sectional questionnaire study, no response rate reported	9% had seen a HCP	16% missed school or work
Secondary School Girls’ Experiences of Menstruation and Awareness of Endometriosis: A Cross-Sectional Study	A.E. Randhawa, A.D. Tufte-Hewett, A.M. Weckesser, G.L. Jones, F.G. Hewett	2021	UK	442 secondary school students, age 15-19 (median 17)	cross-sectional descriptive questionnaire study, response rate 53%	30% had seen a HCP	23% missed school or work
Prevalence and Impact of Dysmenorrhea on Hispanic Female Adolescents	Chantay Banikarim, Mariam R. Chacko, Steve H. Kelder	2000	USA	706 Hispanic students in USA high school, mean age = 16	cross-sectional study, response rate 70.6%	14% had seen a Dr, 49% had seen the school nurse	38% missed school or work
Epidemiology of Adolescent Dysmenorrhea	Klein and Litt	1981	USA	2,699 menarcheal adolescents, drawn from a national probability sample of 12- to 17-year-old girls (the National Health Examination Survey),	cross-sectional study, questionnaires, examination by health professional, laboratory and psychology test variables, embedded study within an existing cohort	not recorded	14% missed school or work
